# Supplementary material
Source: HighWire-hosted journal article supplement (https://bmjopen.bmj.com/content/7/5/e014487)
Supplement: inline-supplementary-material-1 [file inline-supplementary-material-1.pdf]

**Supplementary Table: Estimates of the relationship between support outcomes and bereavement exposure (suicide *versus* non-suicide sudden death)**

| Exposure group                                              | Non-suicide sudden death<br>(n=2818) |                           | Suicide<br>(n = 614) |                                      |              |                                                 |              |
|-------------------------------------------------------------|--------------------------------------|---------------------------|----------------------|--------------------------------------|--------------|-------------------------------------------------|--------------|
|                                                             | Prevalence<br>n (%)                  | Odds ratio<br>(reference) | Prevalence<br>n (%)  | Unadjusted<br>odds ratio<br>(95% CI) | p<br>value*  | Adjusted <sup>a</sup> odds<br>ratio<br>(95% CI) | p value*     |
| receipt of formal support<br>post-bereavement               | 1048<br>(37)                         | 1                         | 221<br>(36)          | 0.96<br>(0.79-1.16)                  | 0.644        | 1.08<br>(0.88-1.31)                             | 0.472        |
| receipt of informal<br>support post-<br>bereavement         | 1887<br>(67)                         | 1                         | 389<br>(63)          | 0.82<br>(0.67-0.99)                  | 0.042        | <b>0.78†</b><br><b>(0.64-0.96)</b>              | <b>0.018</b> |
| <b>Secondary outcomes</b>                                   |                                      |                           |                      |                                      |              |                                                 |              |
| no support post-<br>bereavement <sup>b</sup>                | 557<br>(20)                          | 1                         | 141<br>(23)          | 1.31<br>(1.05-1.62)                  | 0.016        | 1.32<br>(1.06-1.67)                             | 0.014        |
| immediate receipt of<br>support (<1 week)                   | 1219<br>(43)                         | 1                         | 219<br>(36)          | <b>0.74</b><br><b>(0.61-0.90)</b>    | <b>0.002</b> | <b>0.74†</b><br><b>(0.61-0.90)</b>              | <b>0.003</b> |
| delayed receipt of<br>valuable support (>6<br>months)       | 1105<br>(39)                         | 1                         | 271<br>(44)          | 1.24<br>(1.02-1.49)                  | 0.028        | 1.28<br>(1.05-1.56)                             | 0.017        |
| use of formal support<br>exclusively <sup>c</sup>           | 293/2131<br>(14)                     | 1                         | 68/441<br>(15)       | 1.18<br>(0.88-1.59)                  | 0.264        | 1.27<br>(0.93-1.72)                             | 0.130        |
| help sought for post-<br>bereavement self-harm <sup>d</sup> | 50/154<br>(32)                       | 1                         | 19/56<br>(34)        | 1.02<br>(0.52-2.02)                  | 0.949        | 1.22<br>(0.57-2.61)                             | 0.612        |

<sup>a</sup> adjusted for age, gender, socio-economic status, pre-loss depression, pre-loss suicidal and non-suicidal self-harm, other family history of suicide (excluding index bereavement), time since bereavement, and kinship to the deceased.

<sup>b</sup> outcome excluded those who solely endorsed that they chose to handle the bereavement alone

<sup>c</sup> in sub-set of n=2,572 receiving support after bereavement

<sup>d</sup> in sub-set of n=210 who had attempted suicide post-bereavement

\* significance threshold of p=0.05 for primary outcomes and p=0.01 for secondary outcomes

† association no longer significant when stigma added to final adjusted model
